# Supplementary material for: Synthesis of benzoin under supramolecular catalysis involving cyclodextrins in water: application for the preparation of the antiepileptic drug phenytoin
Source: Royal Society of Chemistry journal article supplement (doi:10.1039/d1ra09062c), 2022-01-01
Supplement: d1ra09062c1.pdf [file d1ra09062c1.pdf]

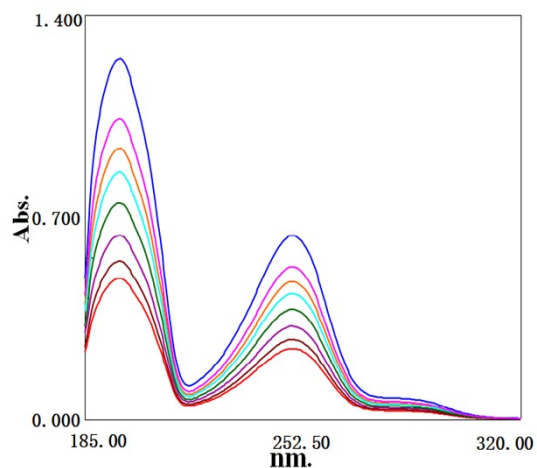

**Figure S1.** UV-vis absorption spectra of benzaldehyde at various concentrations of HP-β-CD ( $1 \times 10^{-3}$ ~5 M) by the phase-solubility method.

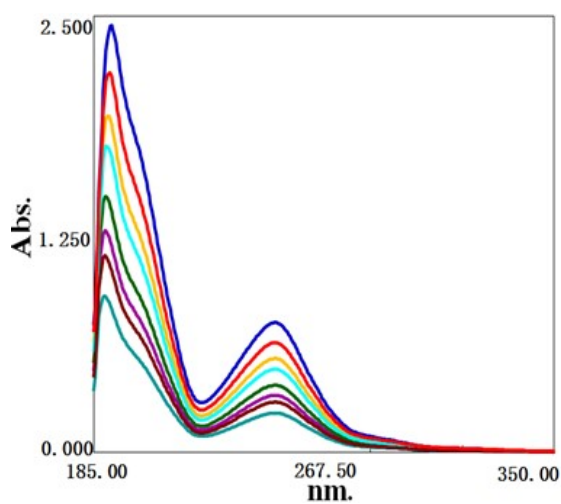

**Figure S2.** UV-vis absorption spectra of benzoin at various concentrations of HP-β-CD ( $1 \times 10^{-3}$ ~5 M) by the phase-solubility method.

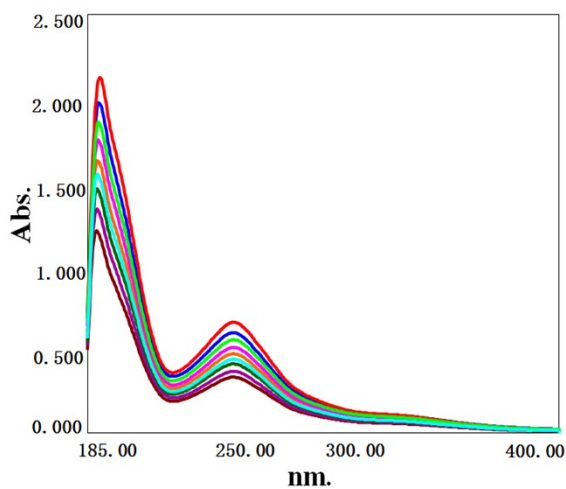

**Figure S3.** UV-vis absorption spectra of 1,2-diphenylethanedione at various concentrations of HP-β-CD ( $1 \times 10^{-3}$ ~5 M) by the phase-solubility method.

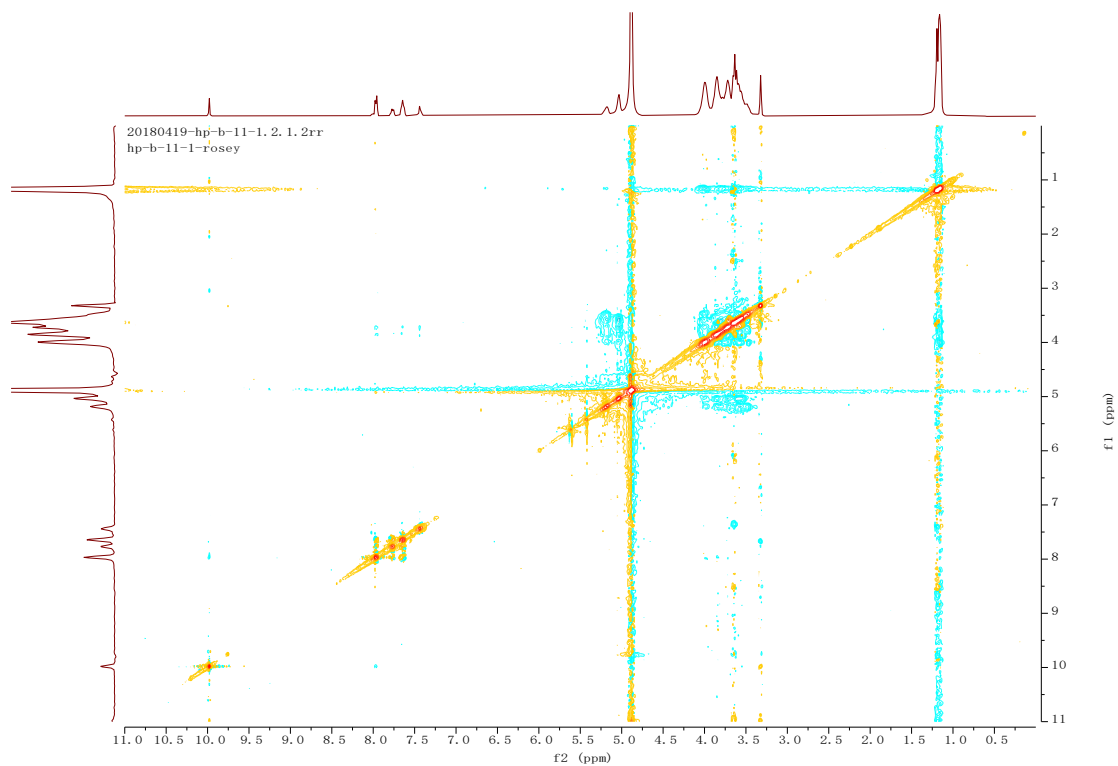

**Figure S4.** The raw 2D-ROESY map of the inclusion complexes of HP- $\beta$ -CD with benzaldehyde.

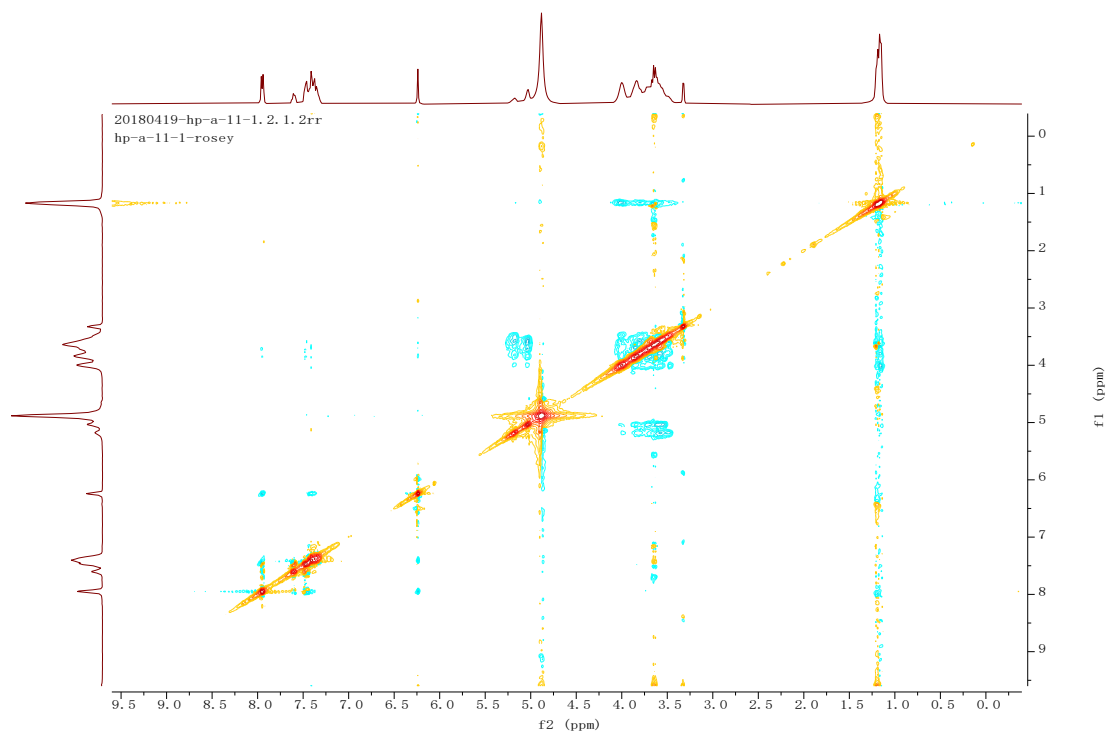

**Figure S5.** The raw 2D-ROESY map of the inclusion complexes of HP- $\beta$ -CD with benzoin.

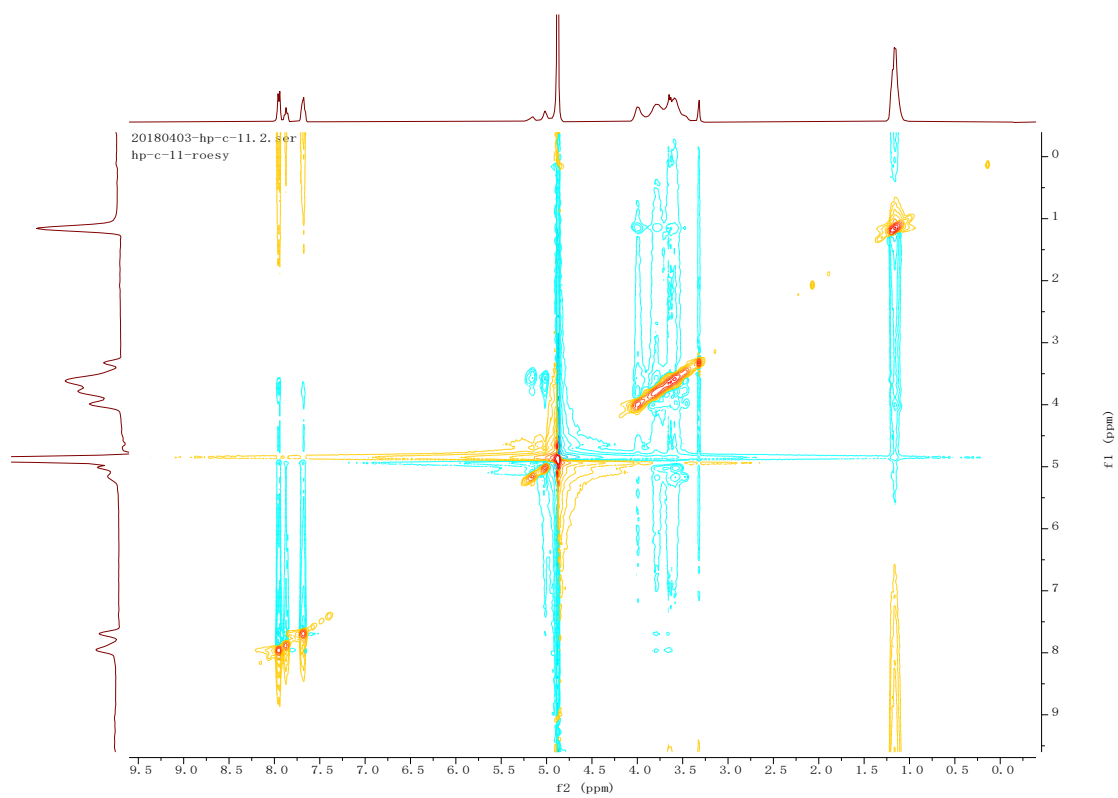

**Figure S6.** The raw 2D-ROESY map of the inclusion complexes of HP- $\beta$ -CD with 1,2-diphenylethanedione.

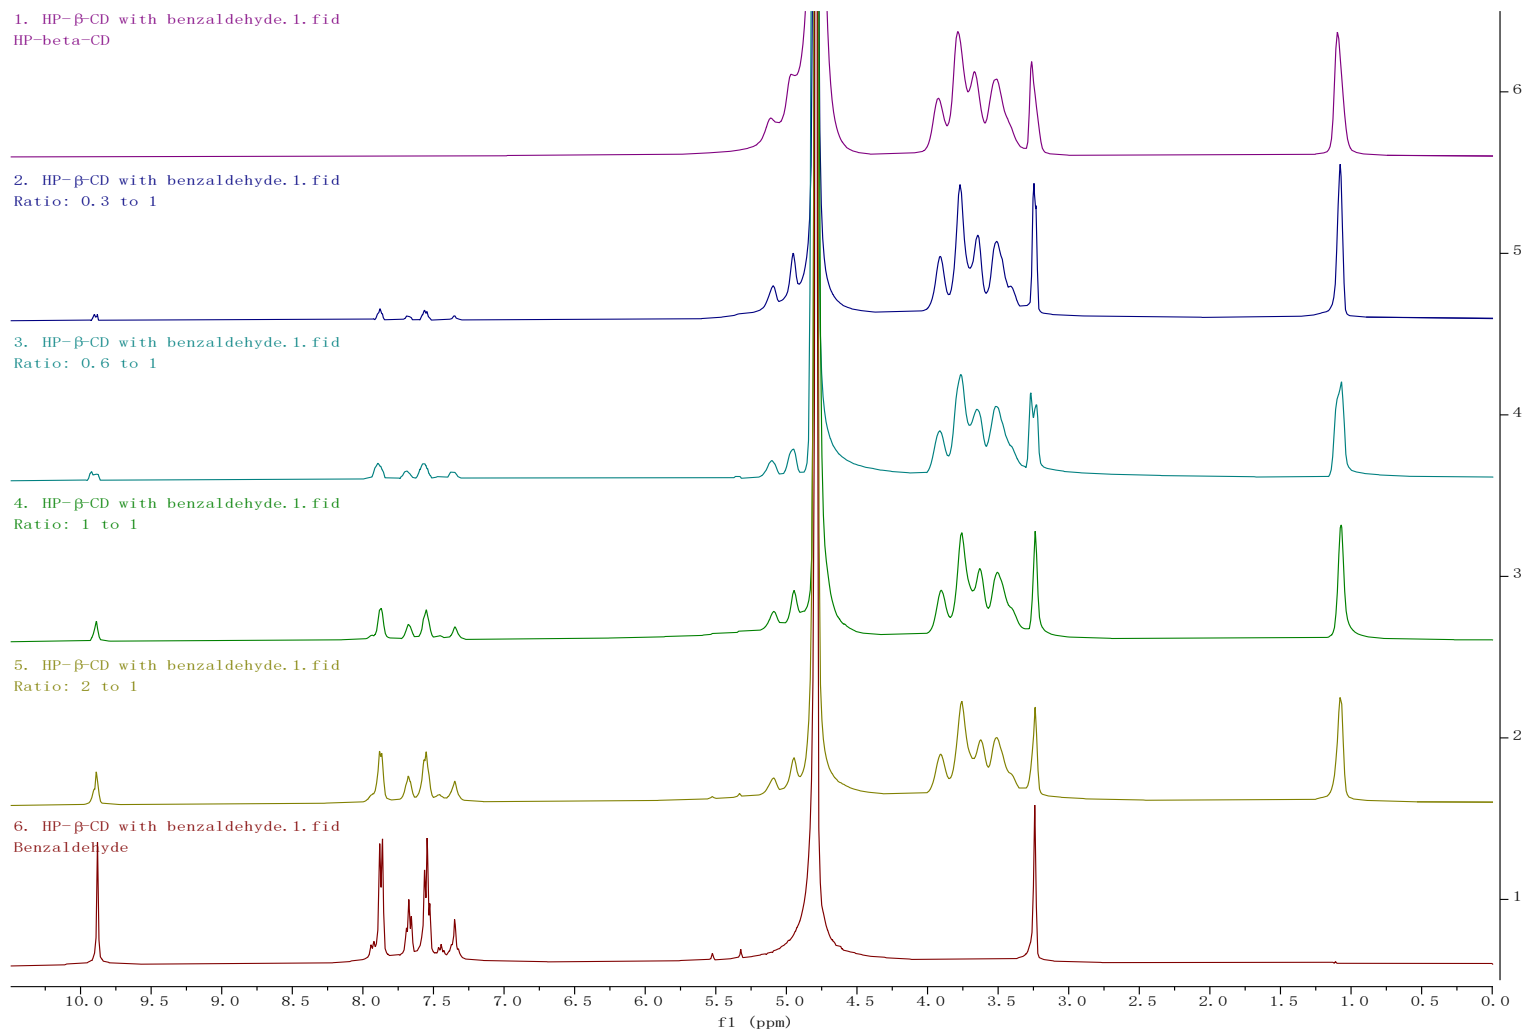

**Figure S7.** The <sup>1</sup>H NMR titration of the inclusion complexes of HP-β-CD with benzaldehyde.

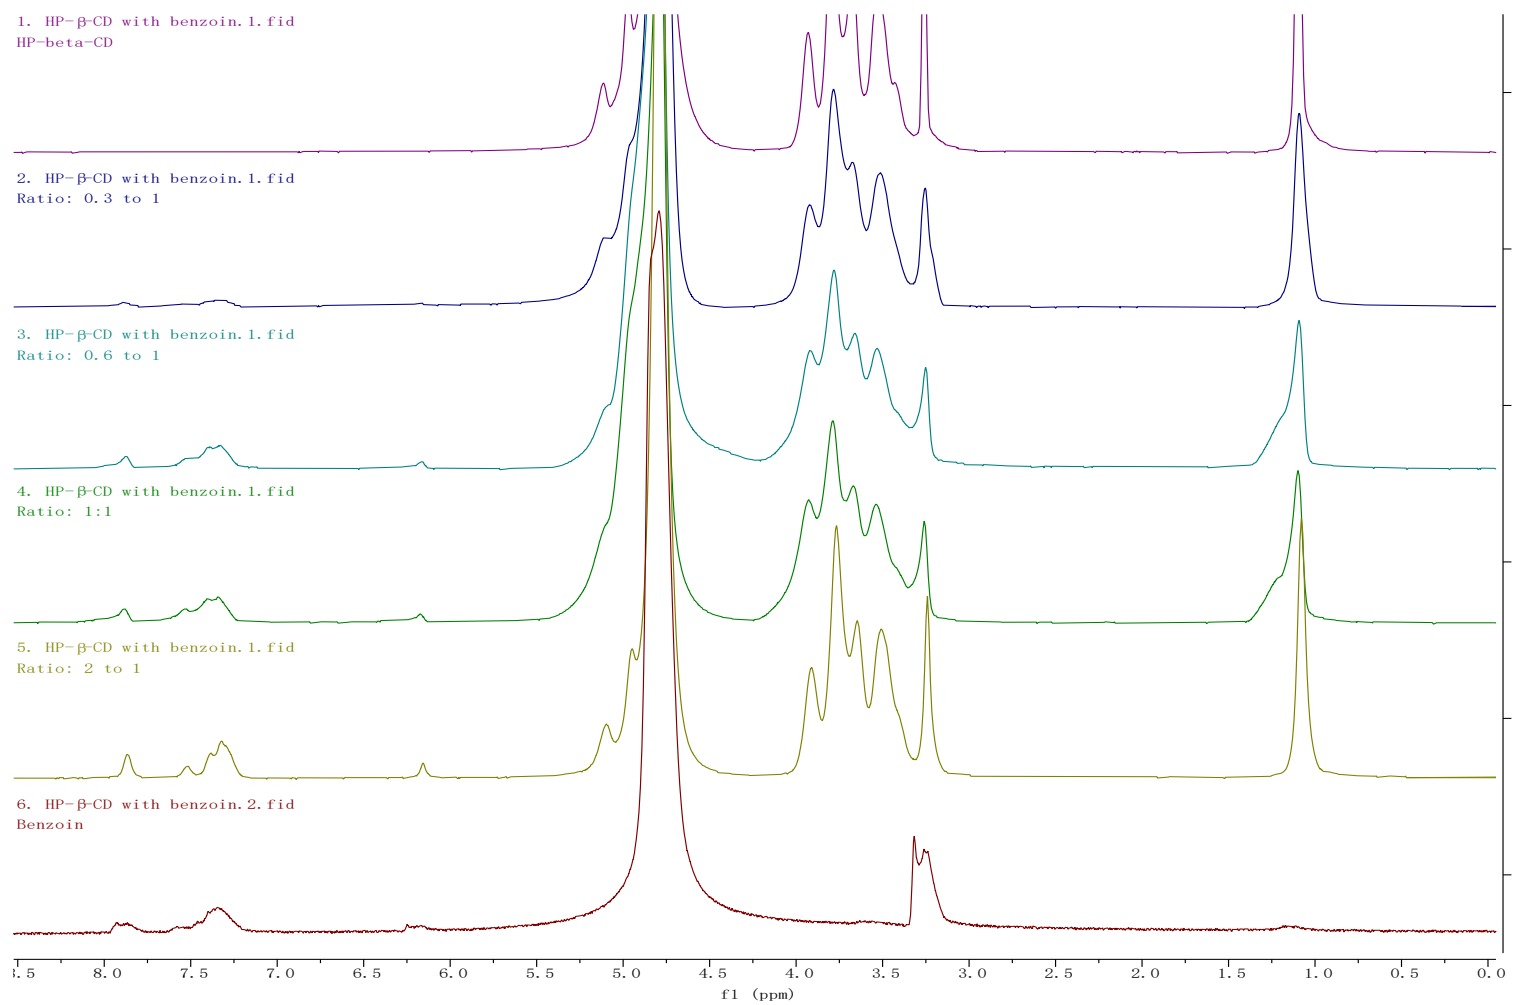

**Figure S8.** The <sup>1</sup>H NMR titration of the inclusion complexes of HP-β-CD with benzoin.

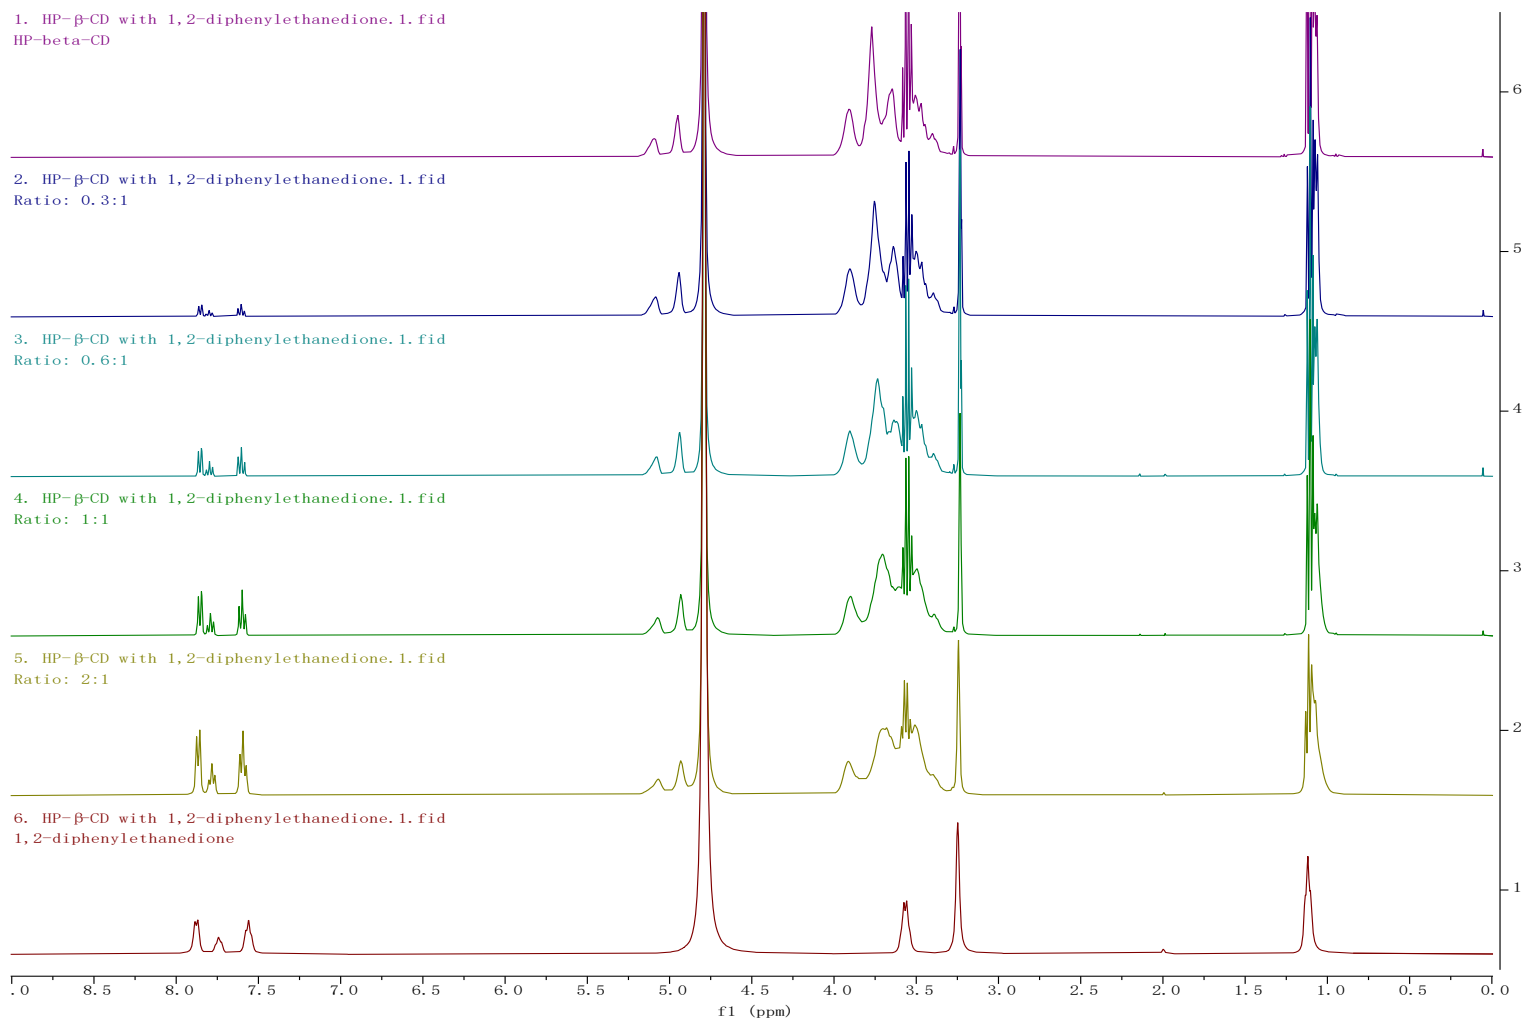

**Figure S9.** The <sup>1</sup>H NMR titration of the inclusion complexes of HP-β-CD with 1,2-diphenylethanedione.
